# Supplementary material for: Role of nanoparticle size and surface chemistry on ion transport and nanostructure of perfluorosulfonic acid ionomer nanocomposites
Source: Royal Society of Chemistry journal article supplement (doi:10.1039/d1sm01573g), 2022-01-01
Supplement: d1sm01573g1.pdf [file d1sm01573g1.pdf]

Electronic Supplementary Information (ESI)

for

## Role of Nanoparticle Size and Surface Chemistry on Ion Transport and Nanostructure of Perfluorosulfonic Acid Ionomer Nanocomposites

*Allison Domhoff<sup>1,‡</sup>, Xueting Wang<sup>1,‡</sup>, Mayura S. Silva<sup>2</sup>, Stephen Creager<sup>2</sup>, Tyler B. Martin<sup>3</sup>, and Eric M. Davis<sup>1,\*</sup>*

<sup>‡</sup>indicates equal contribution

<sup>1</sup>Department of Chemical and Biomolecular Engineering, Clemson University, Clemson, South Carolina 29634, United States

<sup>2</sup>Department of Chemistry, Clemson University, Clemson, South Carolina 29634, United States

<sup>3</sup>National Institute of Standards and Technology (NIST), Gaithersburg, Maryland 20899, United States

\* To whom correspondence should be addressed: [ericd@clemson.edu](mailto:ericd@clemson.edu)

**KEYWORDS:** nanocomposites, Nafion, ionomer, ion transport, vanadium redox flow battery

## Small-Angle Neutron Scattering (SANS)

The full SANS curves for Nafion nanocomposite membranes containing a mass fraction of 5 % SiNPs with various surface chemistries and nominal diameters of 10 nm, 100 nm, 200 nm, and >1  $\mu\text{m}$  are provided in the following figures.

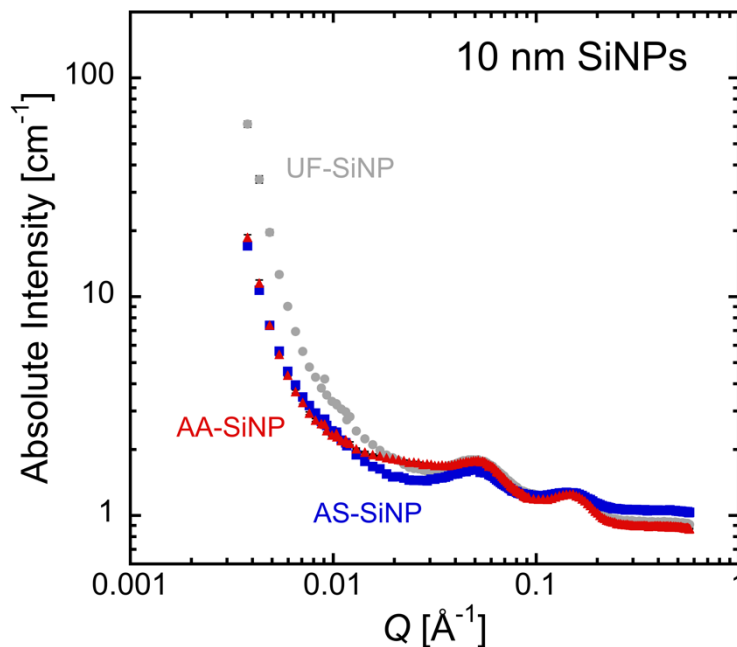

**Figure S1.** Small-angle neutron scattering (SANS) curves for nanocomposites containing a mass fraction of 5 % SiNPs with various surface functionalities and a nominal diameter of 10 nm. Specifically, the SANS curves for Naf-UF-10, Naf-AA-10, and Naf-AS-10 are shown in gray circles, red triangles, and blue squares, respectively. All membranes were hydrated in 100 %  $\text{H}_2\text{O}$  for at least 24 h prior to SANS experiments. The error bars on the SANS data for each membrane represent the standard deviation in calculated intensities. Note, the scattering data shown in this figure have been previously published.

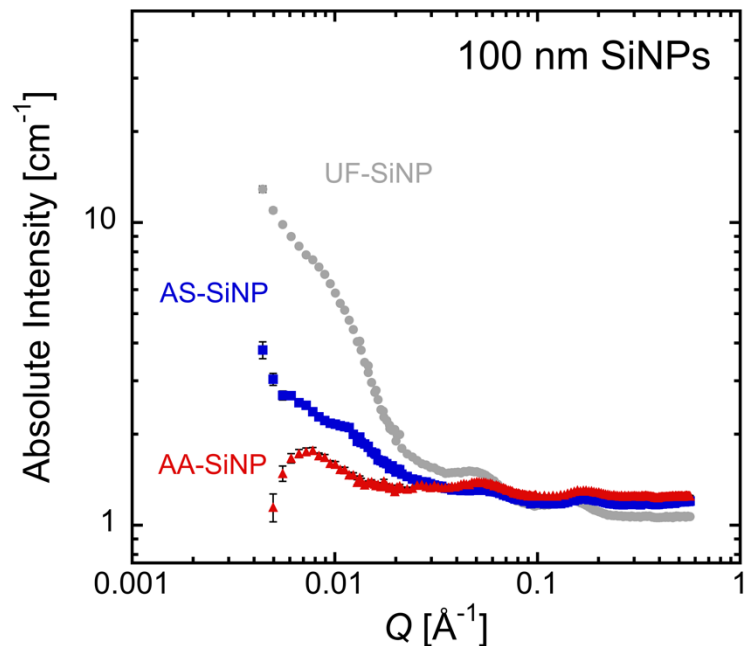

**Figure S2.** Small-angle neutron scattering (SANS) curves for nanocomposites containing a mass fraction of 5 % SiNPs with various surface functionalities and a nominal diameter of 100 nm. Specifically, the SANS curves for Naf-UF-100, Naf-AA-100, and Naf-AS-100 are shown in gray circles, red triangles, and blue squares, respectively. All membranes were hydrated in 100 %  $\text{H}_2\text{O}$  for at least 24 h prior to SANS experiments. The error bars on the SANS data for each membrane represent the standard deviation in calculated intensities.

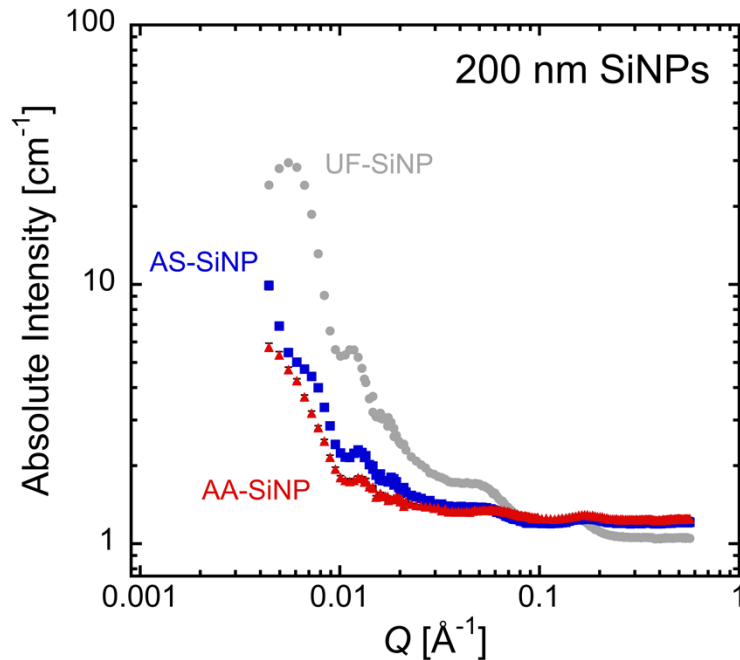

**Figure S3.** Small-angle neutron scattering (SANS) curves for nanocomposites containing a mass fraction of 5 % SiNPs with various surface functionalities and a nominal diameter of 200 nm. Specifically, the SANS curves for Naf-UF-200, Naf-AA-200, and Naf-AS-200 are shown in gray circles, red triangles, and blue squares, respectively. All membranes were hydrated in 100 %  $\text{H}_2\text{O}$  for at least 24 h prior to SANS experiments. The error bars on the SANS data for each membrane represent the standard deviation in calculated intensities.

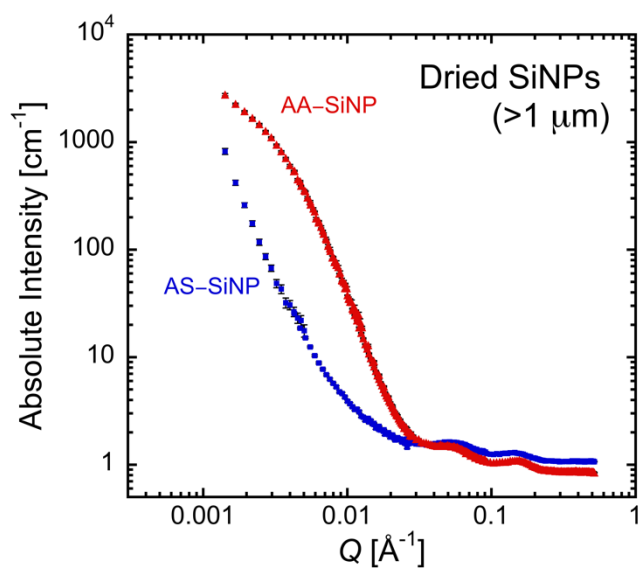

**Figure S4.** Small-angle neutron scattering (SANS) curves for nanocomposites containing a mass fraction of 5 % SiNPs with various surface functionalities and a nominal diameter of  $>1 \mu\text{m}$ . Specifically, the SANS curves for Naf-AA-Dried and Naf-AS-Dried are shown in red triangles and blue squares, respectively. All membranes were hydrated in 100 %  $\text{H}_2\text{O}$  for at least 24 h prior to SANS experiments. The error bars on the SANS data for each membrane represent the standard deviation in calculated intensities.
